# Supplementary material for: Etv transcription factors functionally diverge from their upstream FGF signaling in lens development
Source: eLife. 2020 Feb 11;9:e51915. doi: 10.7554/eLife.51915 (PMC7069720; doi:10.7554/eLife.51915)
Supplement: Figure 2—source data 1. [file elife-51915-fig2-data1.xlsx]

## Sheet: Sheet1
EdU positive cells/DAPI positive cells
Le-Cre	Etv TKO
0.676448	0.481456
0.564158	0.48788
0.703966	0.524043
TUNEL positive cells/DAPI positive cells
WT	Etv TKO
0.0163934	0.26087
0.0425532	0.333333
0	0.25
Relative lens size
WT	Etv TKO
0.915633	0.580645
0.937965	0.636476
1.1464	0.729529
