# Supplementary material for: Etv transcription factors functionally diverge from their upstream FGF signaling in lens development
Source: eLife. 2020 Feb 11;9:e51915. doi: 10.7554/eLife.51915 (PMC7069720; doi:10.7554/eLife.51915)
Supplement: Figure 3—source data 1. [file elife-51915-fig3-data1.xlsx]

## Sheet: Sheet1
Gene expression level measured by RNA-sequencing (cpm)
	Etv flox	Etv TKO
Etv4	1113.5	511.483
Etv5	3827.78	1997.09
Etv1	1113.5	511.483
Fgfr1	2239.21	1179.12
Fgfr3	7114.81	2587.74
Spry2	375.226	153.976
Egr1	199.5	3145.46
Fos	39.7533	434.987
Jag1	7324.95	3348.96
Tsc2	5948.13	1991.49
