# Supplementary material for: Etv transcription factors functionally diverge from their upstream FGF signaling in lens development
Source: eLife. 2020 Feb 11;9:e51915. doi: 10.7554/eLife.51915 (PMC7069720; doi:10.7554/eLife.51915)
Supplement: Figure 5—source data 1. [file elife-51915-fig5-data1.xlsx]

## Sheet: Sheet1
Relative lens area
Le-Cre	Fgf3	Le-Cre;R26-EtvEnR	Le-Cre;Fgf3;R26-EtvEnR
1.02687	1.4215	0.768034	0.619519
1.01414	1.37907	0.793494	0.818953
0.958982	1.37058	0.683168	0.734088
