# Supplementary material for: Etv transcription factors functionally diverge from their upstream FGF signaling in lens development
Source: eLife. 2020 Feb 11;9:e51915. doi: 10.7554/eLife.51915 (PMC7069720; doi:10.7554/eLife.51915)
Supplement: Figure 6—source data 1. [file elife-51915-fig6-data1.xlsx]

## Sheet: Sheet1
Anterior Posterior ratio of the lens
Le-Cre	Etv TKO
0.927935	0.471213
0.937909	0.584672
0.902913	0.441018
