# Supplementary material for: Etv transcription factors functionally diverge from their upstream FGF signaling in lens development
Source: eLife. 2020 Feb 11;9:e51915. doi: 10.7554/eLife.51915 (PMC7069720; doi:10.7554/eLife.51915)
Supplement: Figure 7—figure supplement 1—source data 1. [file elife-51915-fig7-figsupp1-data1.xlsx]

## Sheet: Sheet1
Number of nuclei in the lens center
wiild type	Etv TKO	Tsc1 CKO
0	28	26
0	17	40
0	21	19
